# Supplementary material for: The DNA Damage Response Is Differentially Involved in HPV-Positive and HPV-Negative Radioresistant Head and Neck Squamous Cell Carcinoma
Source: MDPI journal article supplement (doi:10.3390/cancers13153717), 2021-07-23
Supplement: s1 [file s1]

Article

# The DNA Damage Response is Differentially Involved in HPV-Positive and HPV-Negative Radioresistant Head and Neck Squamous Cell Carcinoma

Marieke Bamps <sup>1,†</sup>, Rüveyda Dok <sup>1,†</sup> and Sandra Nuyts <sup>1,2,\*</sup>

## Supplementary Figure Legends

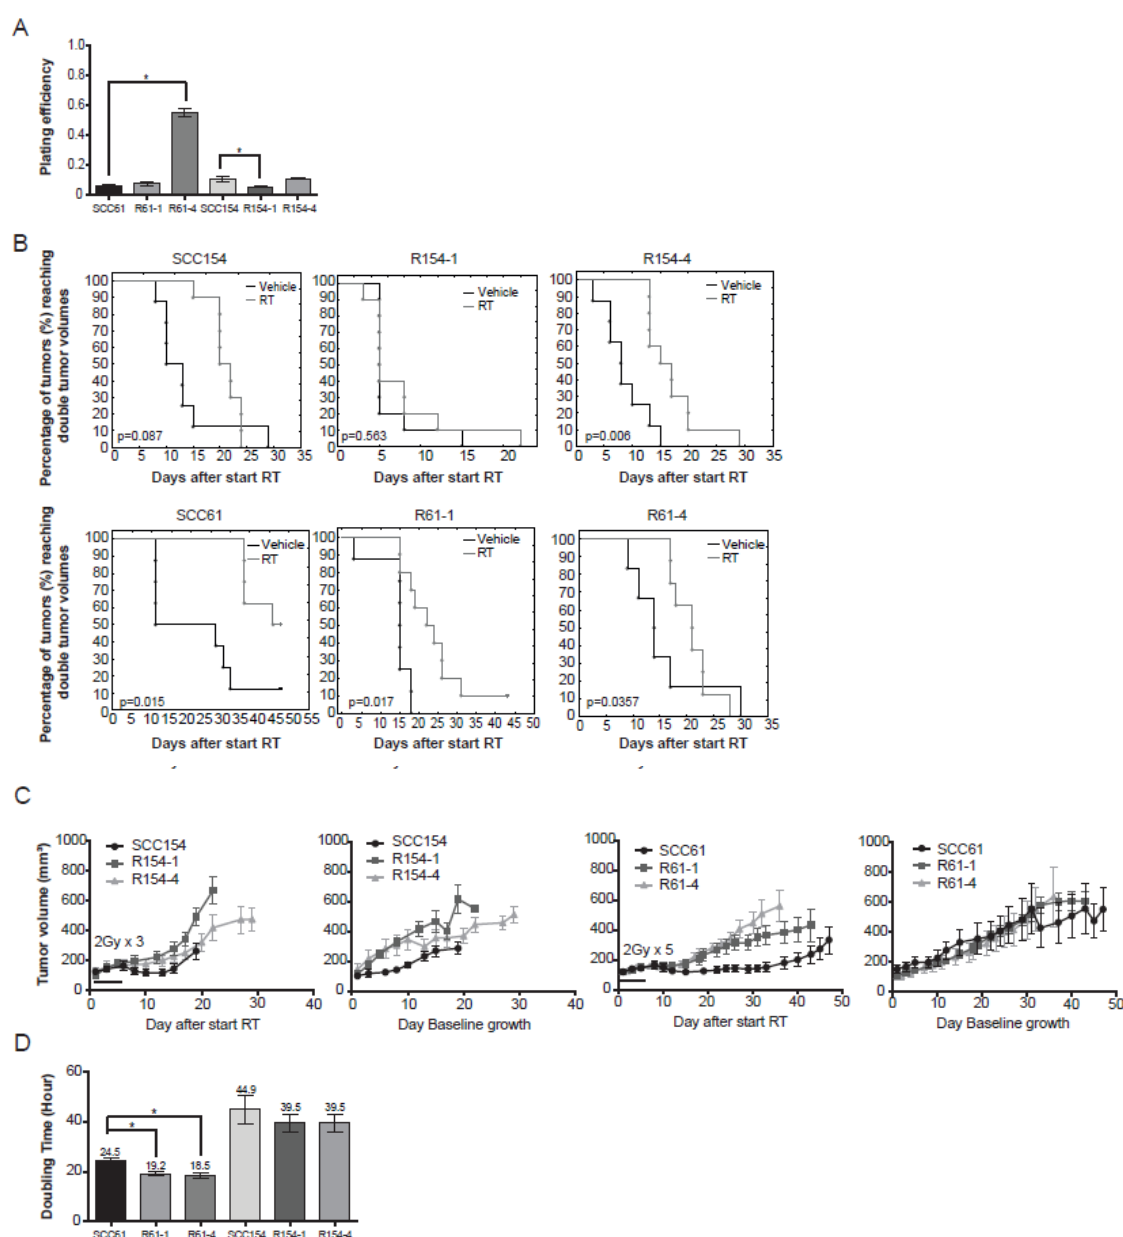

**Figure S1.** (A) Corresponding plating efficiencies of untreated HPV-positive and HPV2 negative parental cells and radioresistant clones of clonogenic assays in Figure 1A. (B) Comparison of the Kaplan–Meier curves of irradiated and non-irradiated tumors of HPV-positive and HPV-negative parental and radioresistant xenografts of Figure 1B and C. Statistics

were performed by log-rank test. (C) Tumor volumes (mm<sup>3</sup>) of irradiated and non-irradiated tumors of HPV-positive and HPV-negative xenografts of Kaplan–Meier curves of Figure 1B and C. RT was given in a fractionated manner with fractions of 2 Gy and total dose of 6 Gy and 10 Gy as indicated on the graphs. (D) Population doubling times of HPV-positive and HPV-negative radioresistant clones and parental cells. (A,D) Data are presented as the mean  $\pm$  SEM for  $n = 3$ . \*  $p$ -values  $< 0.05$  were calculated via ANOVA with multiple comparisons test.

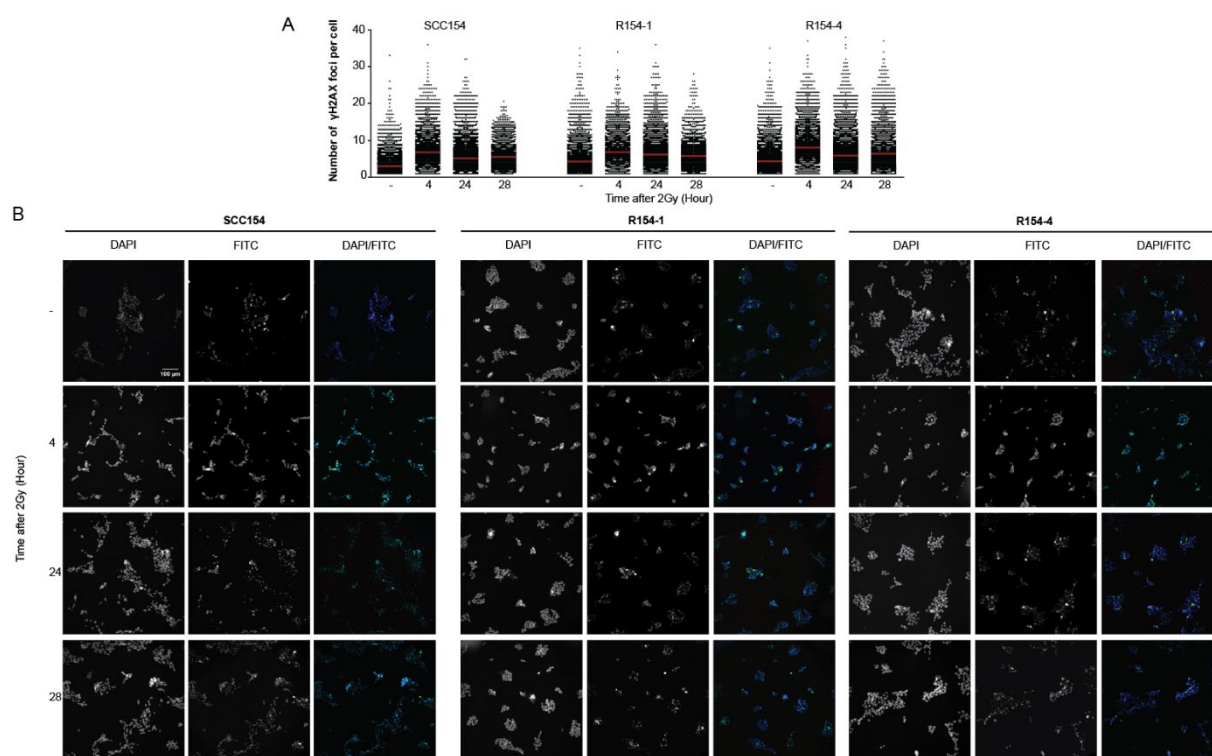

**Figure S2.** (A) Number of  $\gamma$ H2AX foci per cell among all measured cells of HPV-positive parental cells and radioresistant clones in Figure 2A.  $\gamma$ H2AX was determined at indicated time points after an RT dose of 2Gy. (B) Representative immunofluorescence images of the  $\gamma$ H2AX foci (FITC) and corresponding nuclei (DAPI). Images were taken with IN Cell Analyzer 2000 (GE Healthcare, Chicago, IL, USA). Scale bar = 100 $\mu$ m.

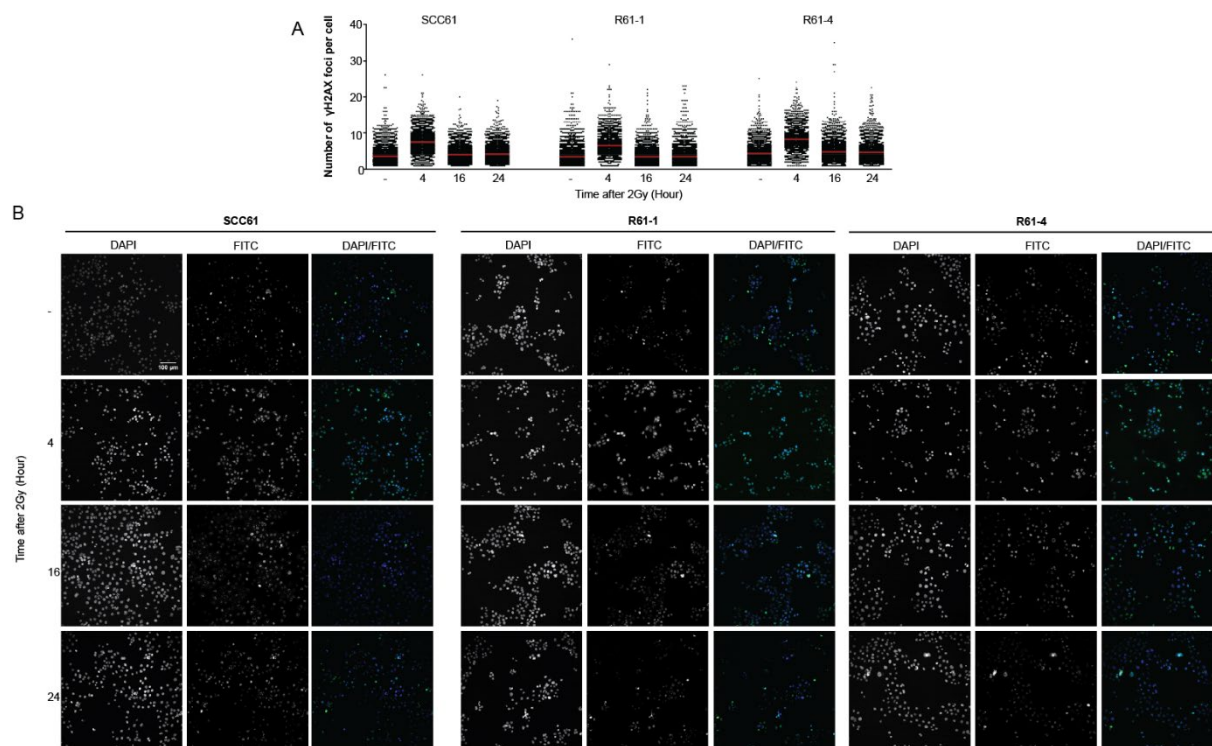

**Figure S3.** (A) Number of  $\gamma$ H2AX foci per cell among all measured cells of HPV-negative parental cells and radioresistant clones in Figure 2A.  $\gamma$ H2AX was determined at indicated time points after an RT dose of 2Gy. (B) Representative immunofluorescence images of the  $\gamma$ H2AX foci (FITC) and corresponding nuclei (DAPI). Images were acquired with IN Cell Analyzer 2000 (GE Healthcare, Chicago, IL, USA). Scale bar = 100 $\mu$ m.

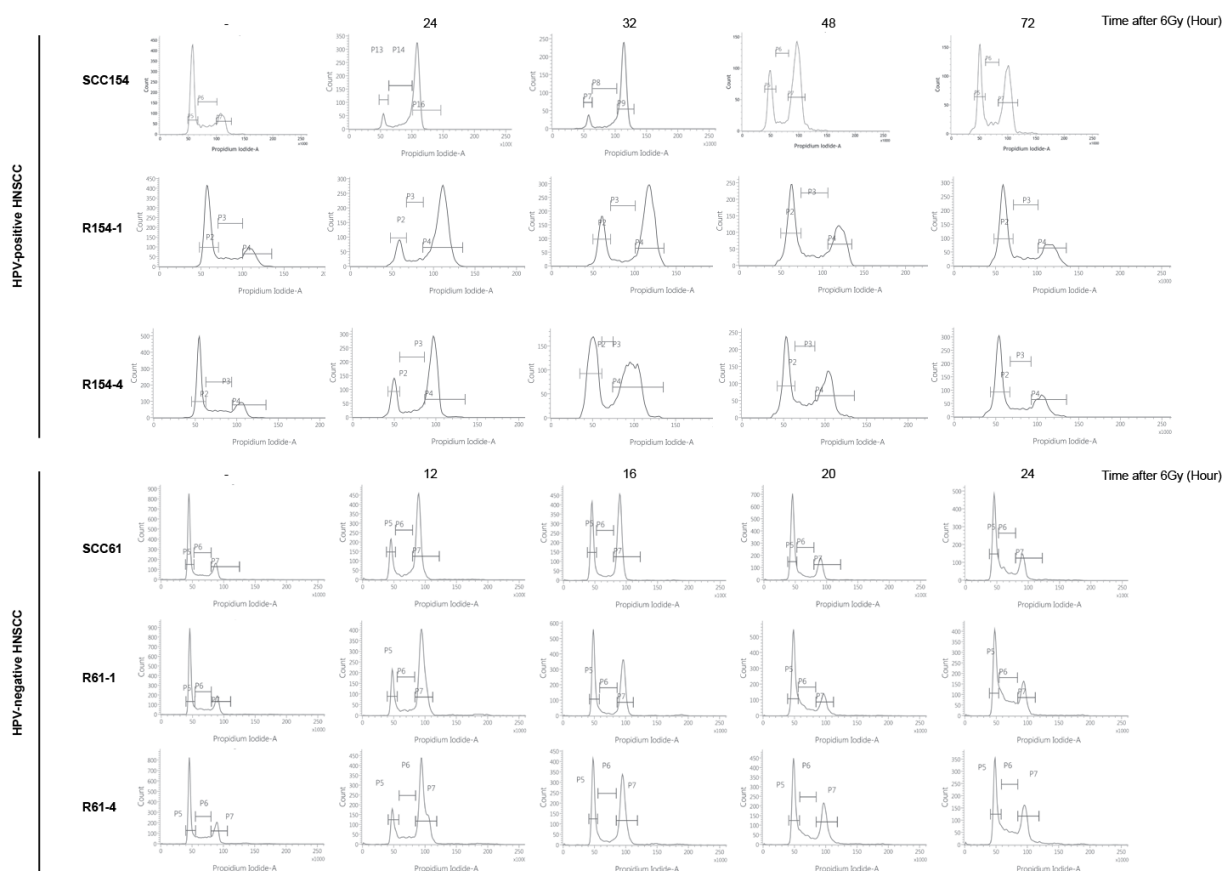

**Figure S4.** Representative cell cycle plots of cell cycle distribution data in Figure 2C. The cell cycle distribution of HPV-positive and HPV-negative parental cells and their radioresistant clones were assessed at unirradiated (-) conditions and at indicated time points after an RT dose of 6Gy with BD FACSVerse (Piscataway, NJ, USA).

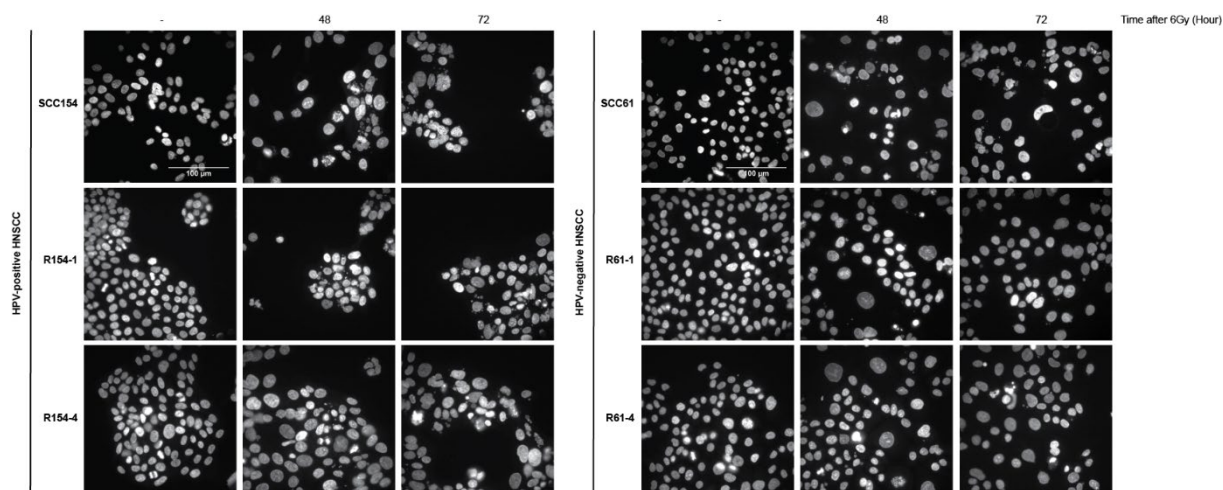

**Figure S5.** Representative immunofluorescence images of the micronuclei assay in Figure 2D are shown. The percentage of micronucleated cells was assessed to the total number of cells for HPV-positive and HPV-negative parental cells and their radioresistant clones at unirradiated conditions (-) and at indicated time points after an RT dose of 6Gy. Immunofluorescence images were acquired with In Cell Analyzer 2000 (GE Healthcare, Chicago, IL, USA). Scale bar = 100μm.

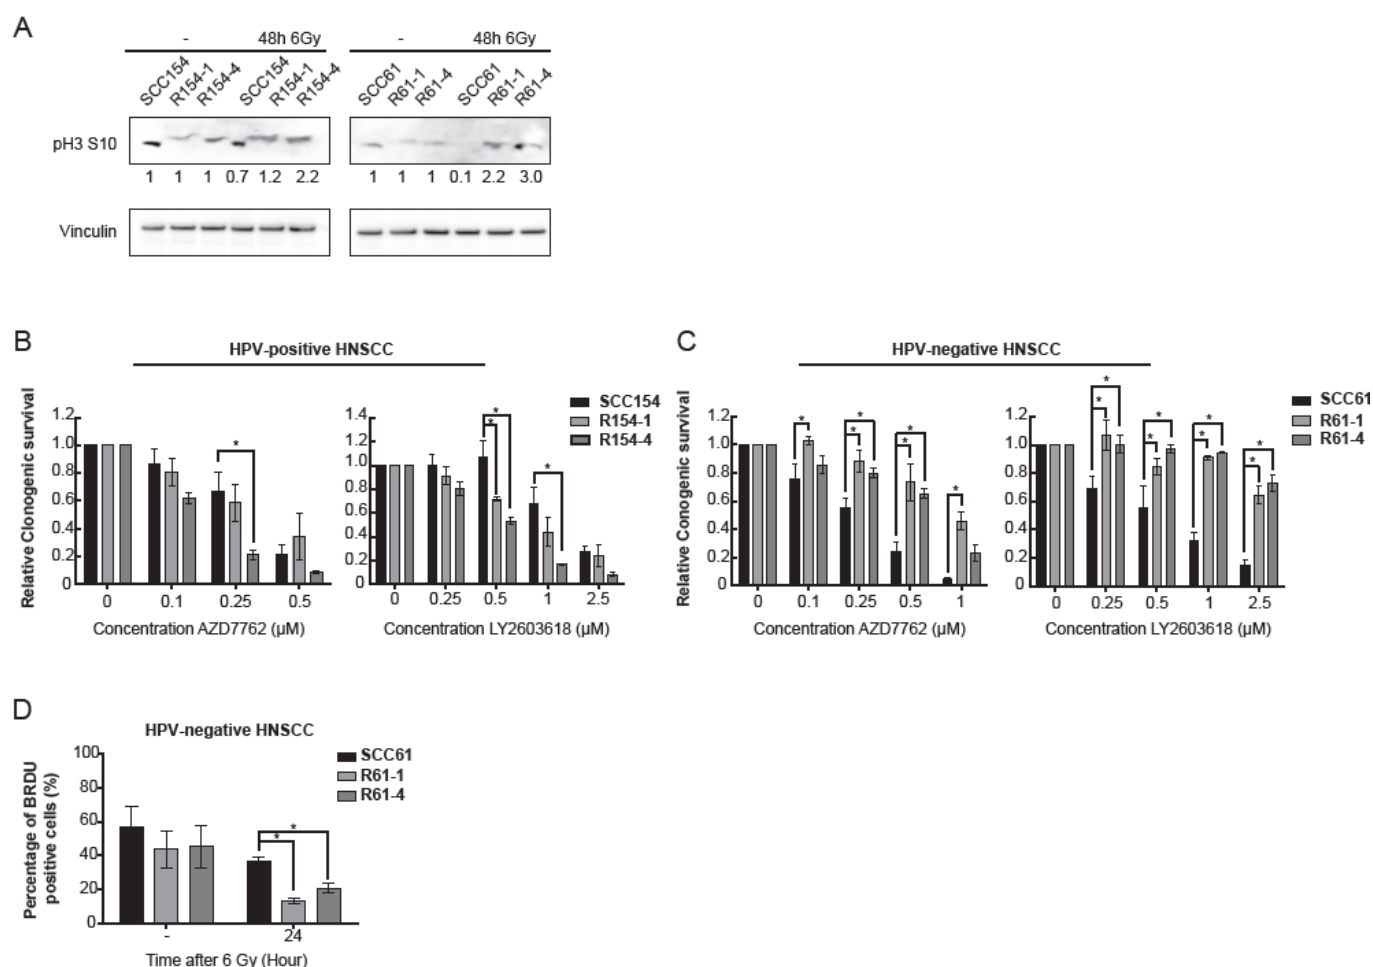

**Figure S6.** (A) Protein levels of pH3 S10 (17kDa) and Vinculin (124kDa) in HPV2 positive and HPV-negative parental cells and radioresistant clones in unirradiated (-) conditions and 48 h after an RT dose of 6 Gy. kDa is the molecular weight as determined by the protein standard. (B) Relative survival of HPV-positive parental cells and radioresistant clones was investigated after treatment with indicated concentrations ( $\mu$ M) of CHK1/2 inhibitor AZD7762 and CHK1 inhibitor LY2603618. (C) Relative survival of HPV-negative parental cells and radioresistant clones was investigated after treatment with indicated concentrations ( $\mu$ M) of CHK1/2 inhibitor AZD7762 and CHK1 inhibitor LY2603618. (D) Percentage of BRDU-positive cells after BRDU-incorporation for 2 hours in SCC61, R61-1 and R61-4 in unirradiated cells (-) and at 24 hours after an RT dose of 6 Gy. Data are presented as the mean  $\pm$  SEM for  $n = 3$ . (B, C) Relative survival was determined by the means of clonogenic survival and shown as the mean  $\pm$  SEM clonogenic survival fraction of drug treated conditions relative to vehicle treated control cells,  $n = 3$ . (B–D) \*  $p$ -values  $< 0.05$  were calculated via ANOVA with multiple comparisons test.

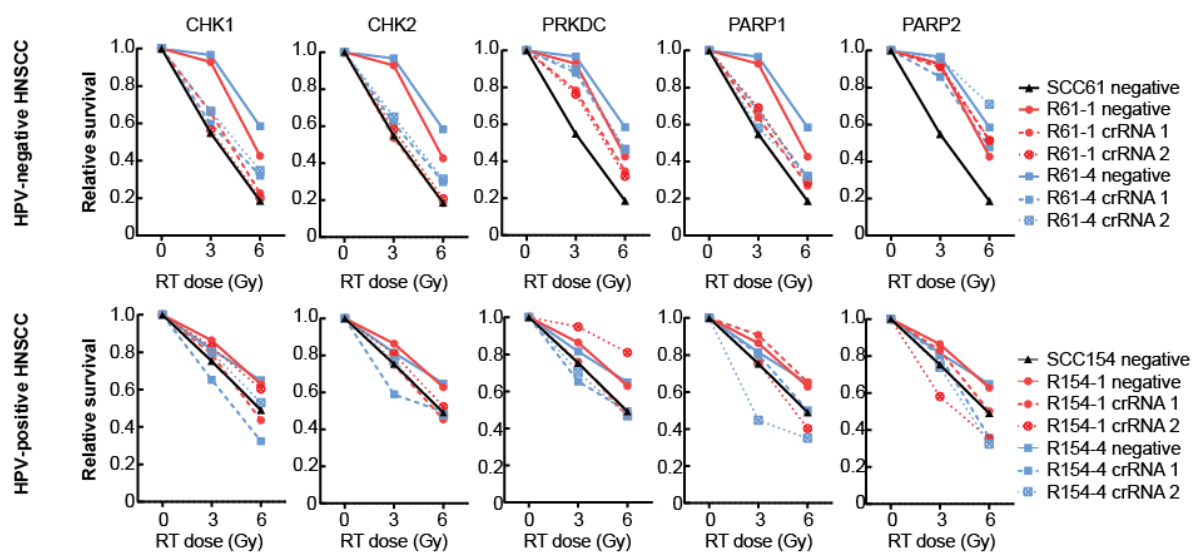

**Figure S7.** Relative cellular survival after indicated RT doses of HPV-positive and HPV-negative radioresistant HNSCC cells upon knockdown of indicated genes, with two CRISPR-Cas9 complexes (crRNA) for each gene. Relative cellular survival was measured by SRB assay and is shown as cellular survival after irradiation relative to non-irradiated cells,  $n=1$ .
